# Supplementary material
Source: PubMed Central journal article supplement (PMC1361767)

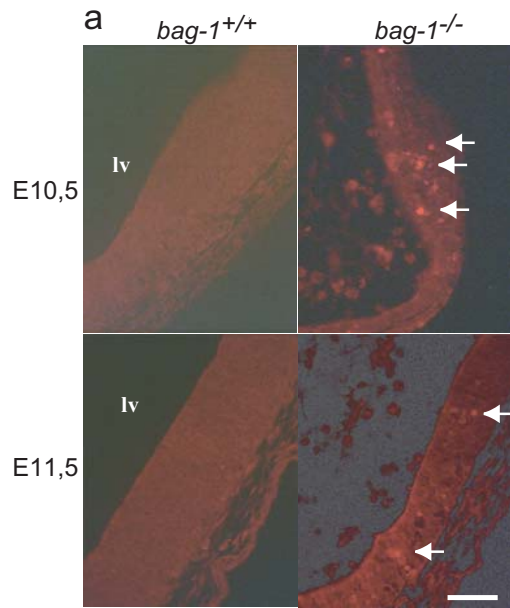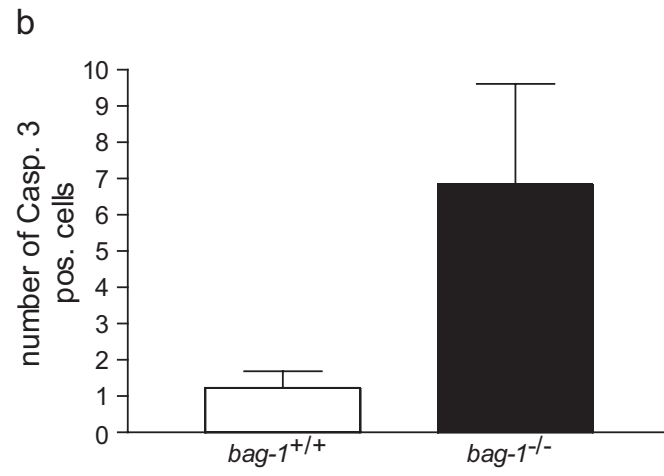

Supplement: NIHMS5012-supplement-sup2.pdf [file NIHMS5012-supplement-sup2.pdf]

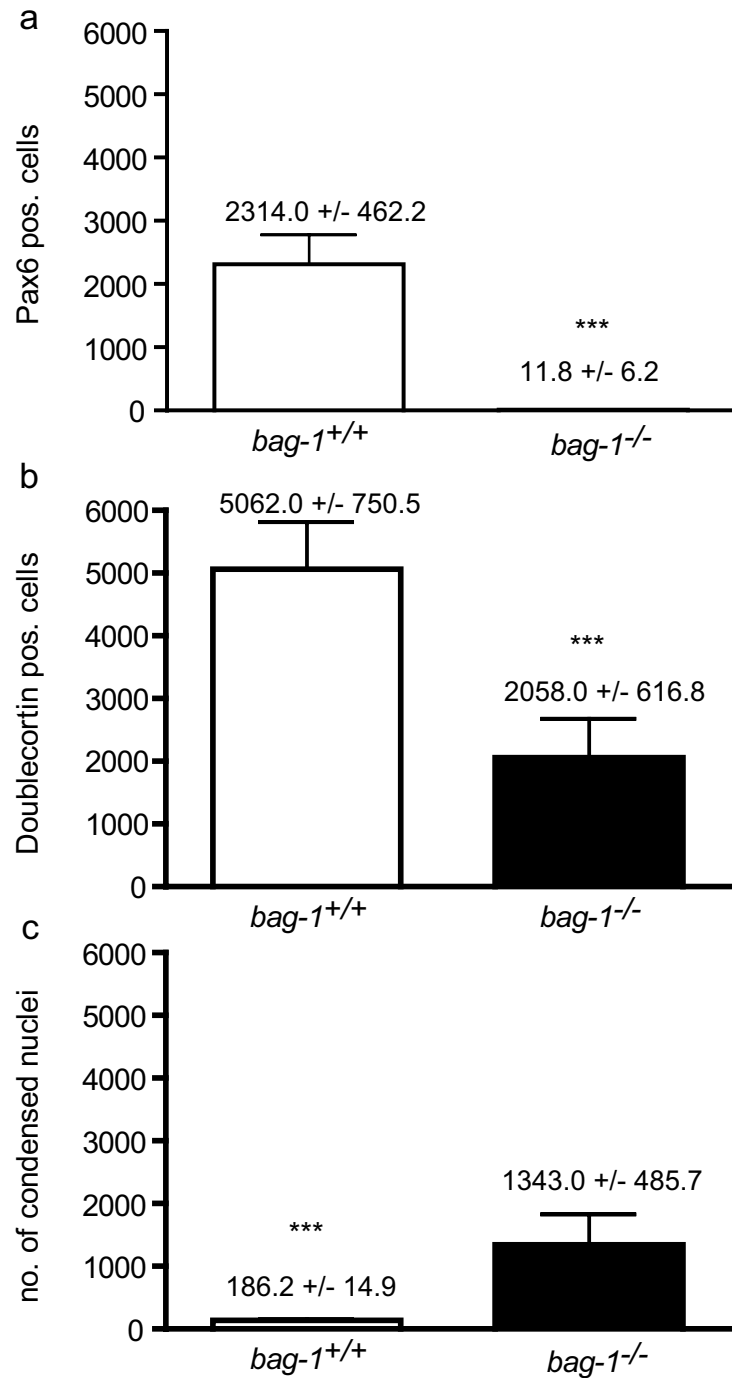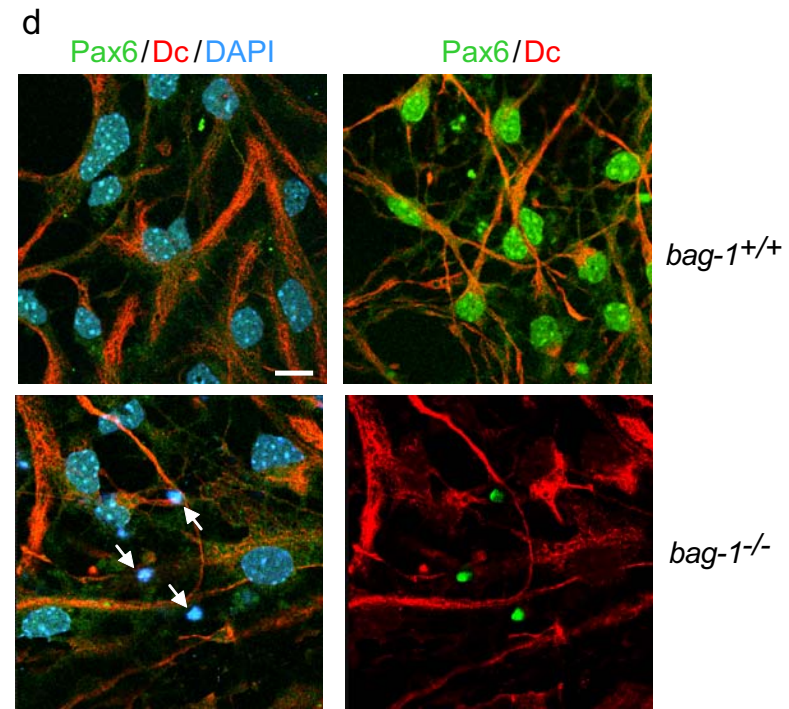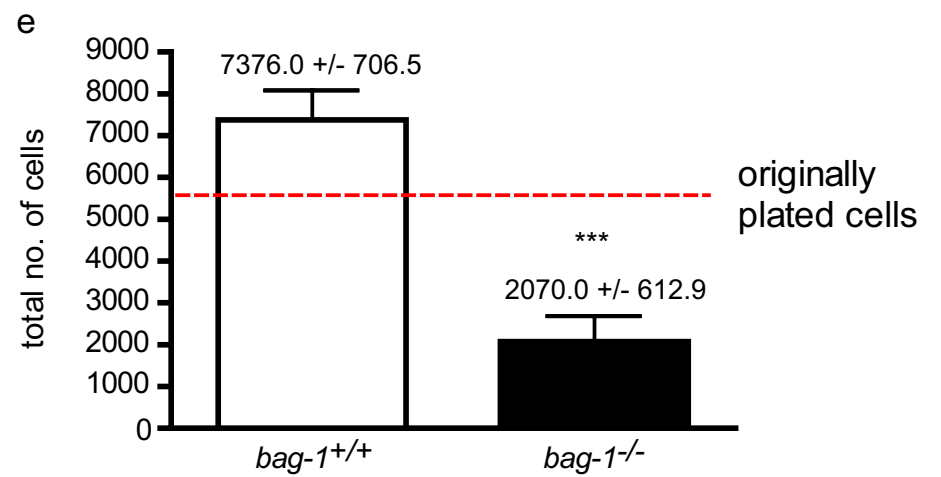

Supplement: NIHMS5012-supplement-sup3.pdf [file NIHMS5012-supplement-sup3.pdf]

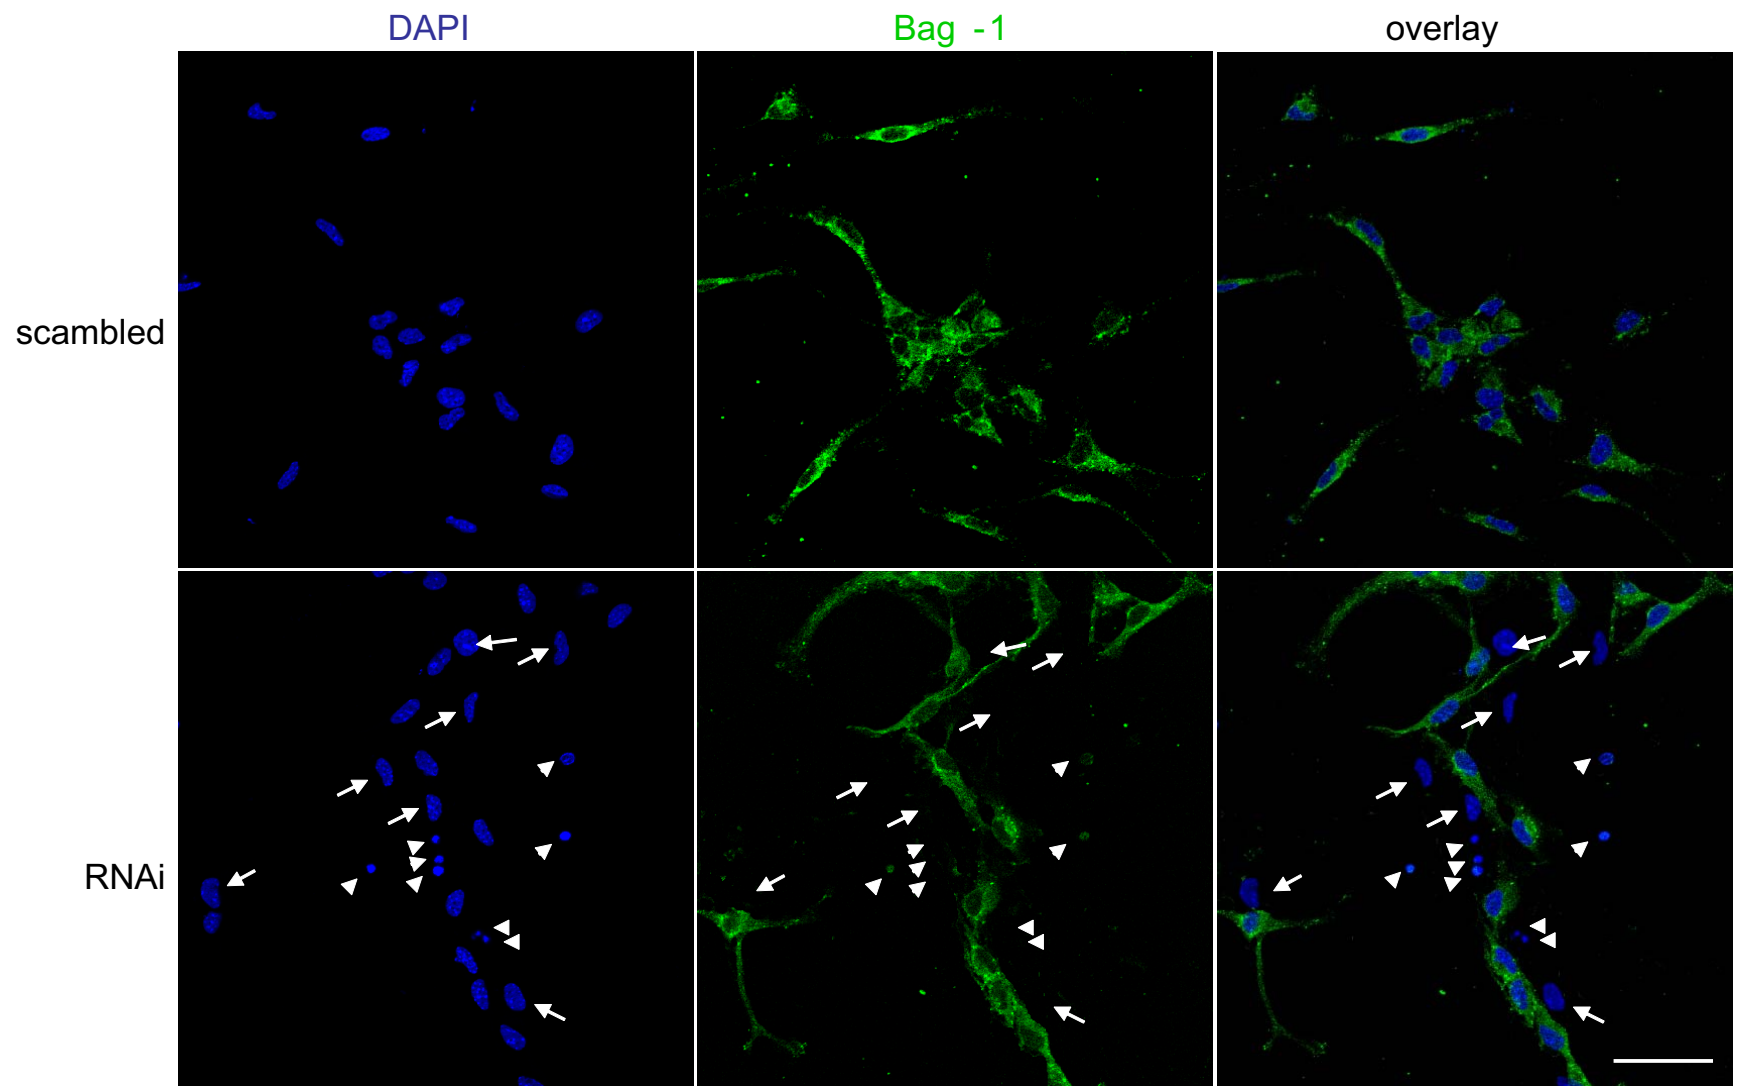

Supplement: NIHMS5012-supplement-sup4.pdf [file NIHMS5012-supplement-sup4.pdf]

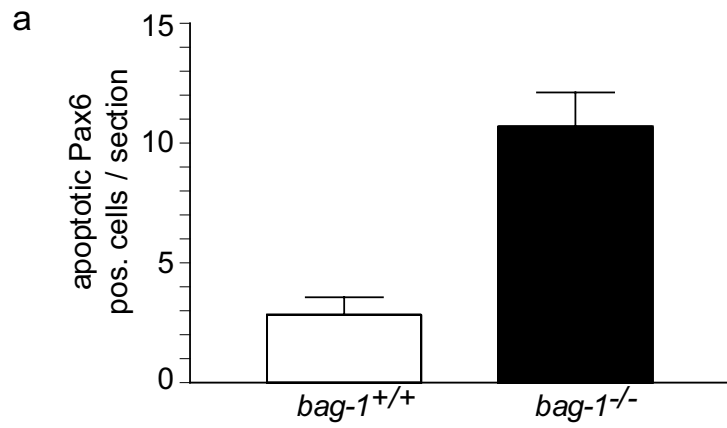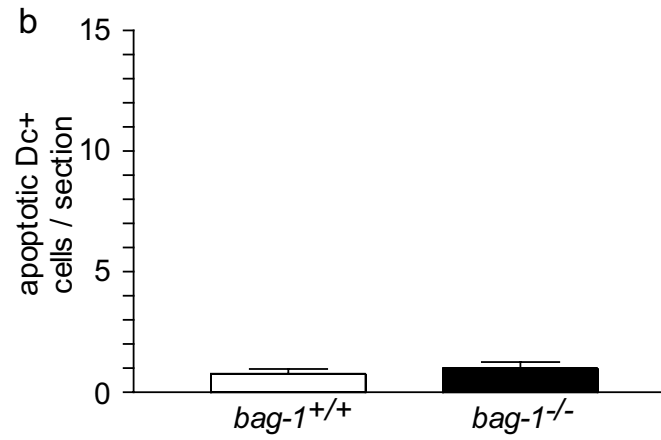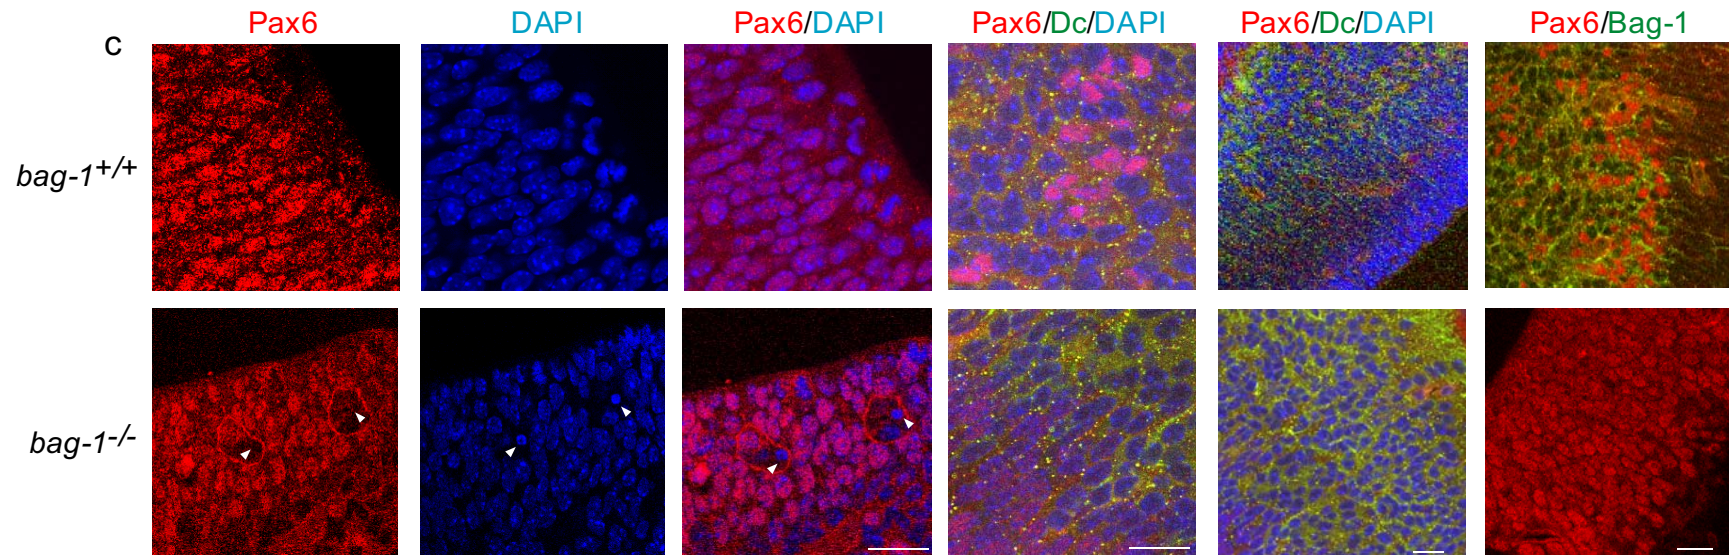

Supplement: NIHMS5012-supplement-sup5.pdf [file NIHMS5012-supplement-sup5.pdf]

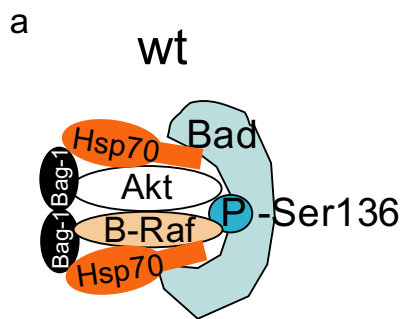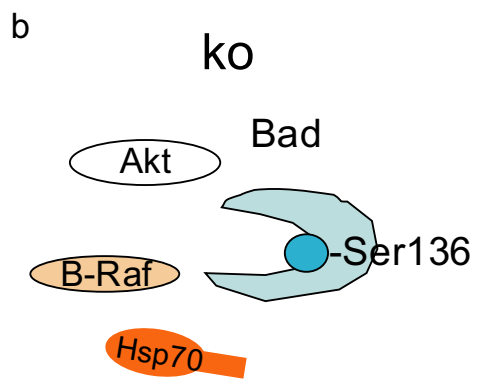

Supplement: NIHMS5012-supplement-sup6.pdf [file NIHMS5012-supplement-sup6.pdf]
